# Supplementary material
Source: PubMed Central journal article supplement (PMC8628866)
Supplement: ntaa221_suppl_Supplementary_Materials.pdf [file ntaa221_suppl_Supplementary_Materials.pdf]

## Abbreviated Qualitative Interview Guide\*

### Module 2: Early vaping/smoking experiences

1. Tell me about your first experience vaping (external environment/logistics).
  - a. How come?
  - b. How old were you?
  - c. How long had you been thinking about vaping before you tried it?
  - d. Would you say it was your own drive or curiosity or influence from others?
  - e. Where were you?
  - f. With whom?
  - g. Did it contain flavor? Nicotine? Another drug? (e.g., THC, CBD)
  - h. Which device did you use?
  - i. Where did you get the vape you used when you tried it for the first time?
  - j. What was the environment like?
  - k. What drug did you vape?
  - l. What type of product did you use? (e.g. vape pen, e-cigarette, Juul, etc.)
  - m. From friends? Family member? Buy directly from a shop? Online?
  - n. How easy/difficult was it for you to obtain the vape/e-cigarette?
  - o. Did they ID you?
2. Tell me about your first experience smoking.
  - a. How come?
  - b. How old were you?
  - c. How long had you been thinking about vaping before you tried it?
  - d. Would you say it was your own drive or curiosity or influence from others?
  - e. Where were you?
  - f. With whom?
  - g. What product/type of cigarette?
  - h. Was it menthol or mint flavored?

### Module 5: Access to tobacco products

1. Describe the availability of e-cigarettes/cigarettes in your community?
  - a. How easy is it to purchase vapes/e-cigarettes?
  - b. Can you buy them online?
  - c. From friends?
  - d. From family?
2. How would you describe the e-cigarettes/cigarettes culture in your neighborhood? Is vaping or smoking cigarettes common?
3. How close do you live to vape shops?
4. How often do you go to the vape shop/online to buy/refill your vape?
5. Do you think vaping is affordable?
6. About how much money do you spend a week/month on vaping products?
  - a. Does vaping cause you any financial strain?

*\*This guide includes the two modules of the interview guide most relevant to the present analysis. For the complete interview guide please contact the corresponding author.*
